# Supplementary material
Source: publisher site journal article supplement (http://www.degruyter.com/publication/journal_key/EHS/downloadAsset/EHS_ARTICLE%20PROCESSING%20CHARGES.pdf)
Supplement: Supplementary file 1 [file EHS_ARTICLE%20PROCESSING%20CHARGES.pdf]

## Article Processing Charges

In order to sustain the production of our fully-refereed open access journal, each article accepted for publication in *Energy Harvesting and Systems* is subject to an Article Processing Charge.

For articles submitted by the end of 2023, the standard APC will be **€1000**. For articles submitted since January 2024, the standard APC will be **€1200**. Other fee reductions are available - see below.

This fee is used to cover the costs of the peer-review process, professional typesetting and copyediting, as well as online hosting, long-term preservation, distribution to libraries and content aggregators worldwide, and extensive promotion to potential readers.

All Authors are encouraged to apply for a **waiver or a discount** due to the Journal's extensive waiver and discount policy. All inquiries concerning Article Processing Charges should be addressed **before or immediately after submission of a paper** to the Editorial Office at [ans.editorial@degruyter.com](mailto:ans.editorial@degruyter.com), so the waivers/further discounts can be reserved in advance.

Information regarding payment of these charges will be provided following acceptance for publication. There are no submission charges – Article Processing Charges apply after the acceptance of a manuscript.

Reviewers are not involved in author payment process and do not discuss charges with authors. The ability to pay does not influence whether or not a manuscript is accepted for publication.

## Waiver Policies

If the submitting author is affiliated with an organization which is listed as an [Institutional Member](#) or which entered an [agreement](#) with De Gruyter, the author may be eligible for a reduced expense. Moreover, the authors who work for institutions in developing countries (countries classified by the World Bank as low-income and lower-middle-income economies) may apply for a waiver. Other authors who do not fulfil these criteria can request a discount during the submission process.

All inquiries concerning Article Processing Charges should be addressed **before or immediately after submission of a paper** to the Editorial Office at the email address [ans.editorial@degruyter.com](mailto:ans.editorial@degruyter.com), so the waivers/further discounts can be reserved in advance.

## Funding Opportunities

Authors who are looking for funds to support the payment of Article Processing Charges have a number of options to consider. For details visit our [website](#).

## Editorial Office

Ewa Sarzyńska  
De Gruyter Poland Ltd.  
Bogumiła Zuga 32A  
01-811 Warsaw / Poland  
Tel: +48 22 701 50 15  
Email: [ewa.sarzynska@degruyter.com](mailto:ewa.sarzynska@degruyter.com)  
[www.degruyter.com/journal/key/ans/html](http://www.degruyter.com/journal/key/ans/html)
